# Supplementary material for: Building dual-phased Ni2P–Ni2P4O12electrocatalysts for efficient urea oxidation reaction
Source: Royal Society of Chemistry journal article supplement (doi:10.1039/d2nj06299b), 2023-01-01
Supplement: d2nj06299b1.pdf [file d2nj06299b1.pdf]

## Supporting Information

### Building dual-phased $\text{Ni}_2\text{P-Ni}_2\text{P}_4\text{O}_{12}$ electrocatalysts for efficient urea oxidation reaction

*Jijia Zhou,<sup>a</sup> Xiujuan Sun,<sup>\*a</sup> Wenjuan Tan,<sup>a</sup> Qiuhan Cao,<sup>a</sup> Yongjie Zhao,<sup>a</sup> Rui Ding,<sup>a</sup> Yuwei Zhang,<sup>\*b</sup> Enhui Liu<sup>a</sup> and Ping Gao<sup>a</sup>*

<sup>a</sup>Key Laboratory of Environmentally Friendly Chemistry and Applications of Ministry of Education, College of Chemistry, Xiangtan University, Hunan 411105, P.R. China.

<sup>b</sup>Guangzhou Key Laboratory of Sensing Materials & Devices, School of Chemistry and Chemical Engineering, Guangzhou University, Guangzhou 510006, P.R. China.

\*Corresponding authors E-mail: sunxj594@xtu.edu.cn; ccywzhang@gzhu.edu.cn

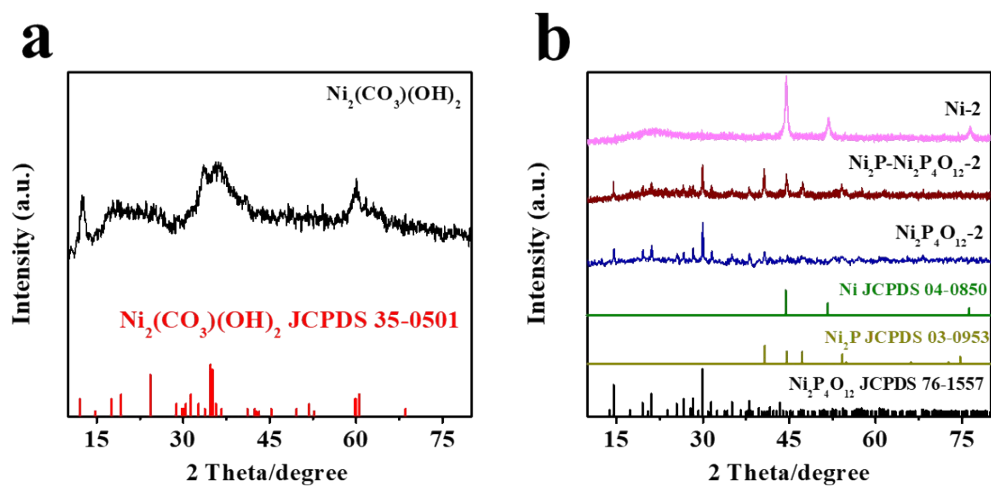

**Fig. S1** XRD patterns of (a) the precursor; (b) Ni-2,  $\text{Ni}_2\text{P-Ni}_2\text{P}_4\text{O}_{12}\text{-2}$ ,  $\text{Ni}_2\text{P}_4\text{O}_{12}\text{-2}$

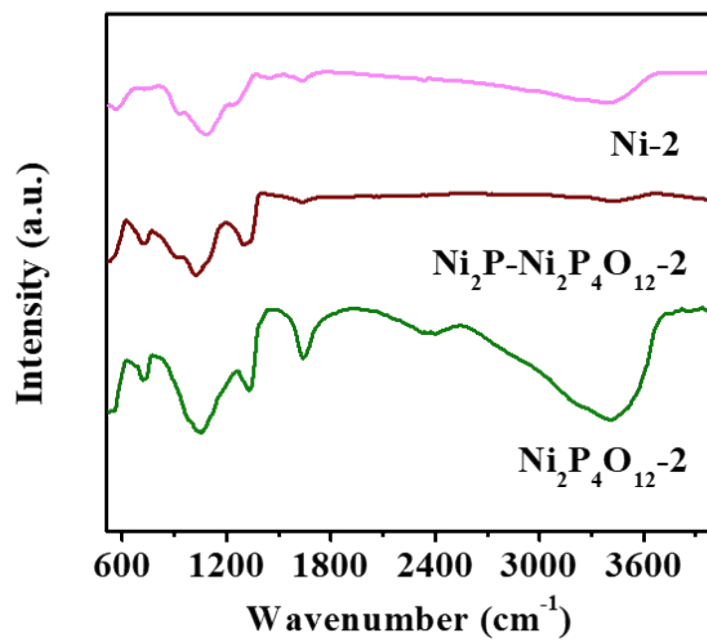

**Fig. S2** The FT-IR of Ni-2, Ni<sub>2</sub>P-Ni<sub>2</sub>P<sub>4</sub>O<sub>12</sub>-2, Ni<sub>2</sub>P<sub>4</sub>O<sub>12</sub>-2.

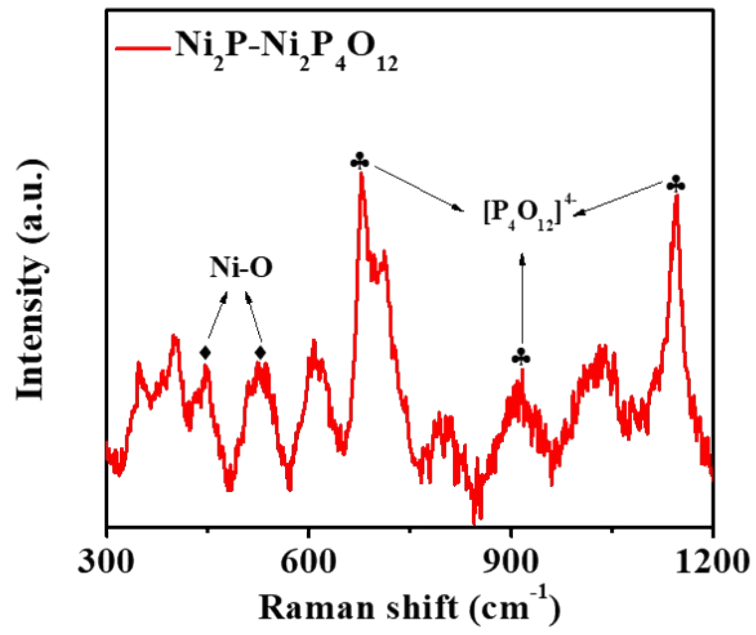

**Fig. S3** The Raman spectra of  $\text{Ni}_2\text{P-Ni}_2\text{P}_4\text{O}_{12}$ .

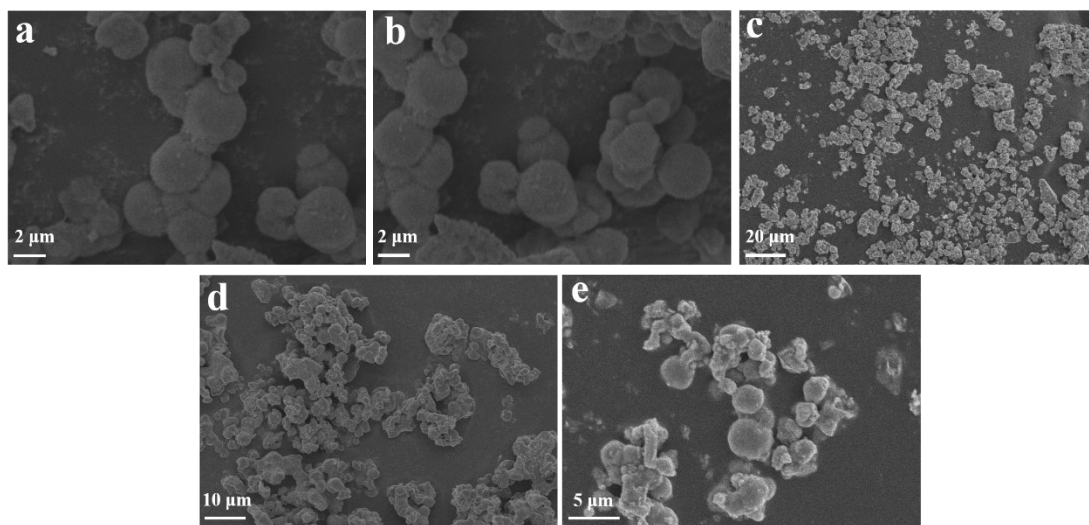

**Fig. S4** The SEM images of (a) Ni, (b) Ni-2, (c)  $\text{Ni}_2\text{P-Ni}_2\text{P}_4\text{O}_{12-2}$ , (d)  $\text{Ni}_2\text{P}_4\text{O}_{12}$ , and (e)  $\text{Ni}_2\text{P}_4\text{O}_{12-2}$ .

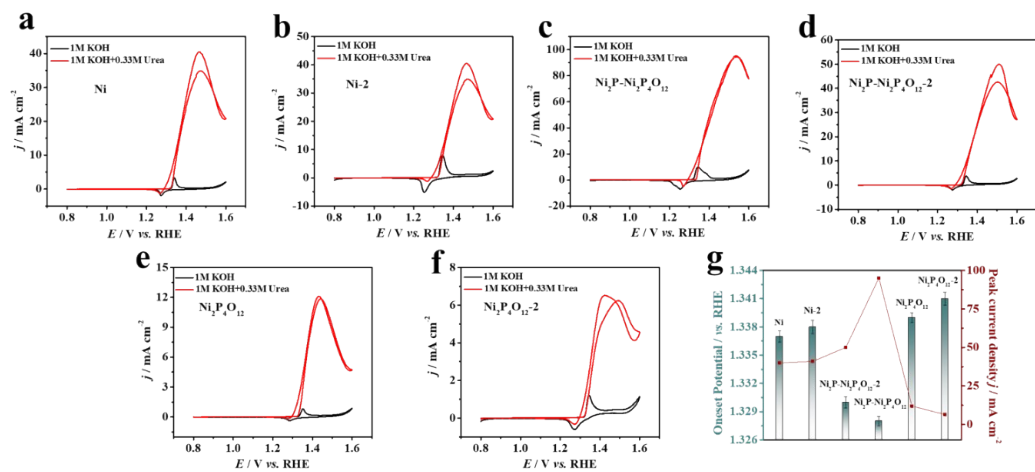

**Fig. S5** The CV curves (10 mV s<sup>-1</sup>) of (a) Ni, (b) Ni-2, (c) Ni<sub>2</sub>P-Ni<sub>2</sub>P<sub>4</sub>O<sub>12</sub>-2, (d) Ni<sub>2</sub>P-Ni<sub>2</sub>P<sub>4</sub>O<sub>12</sub>, (e) Ni<sub>2</sub>P<sub>4</sub>O<sub>12</sub>, (f) Ni<sub>2</sub>P<sub>4</sub>O<sub>12</sub>-2 in 1 M KOH solution with the presence/absence of 0.33 M urea and (g) onset-potentials ( $E_{\text{onset}}$ ) and peak current densities ( $J_p$ ) of different samples.

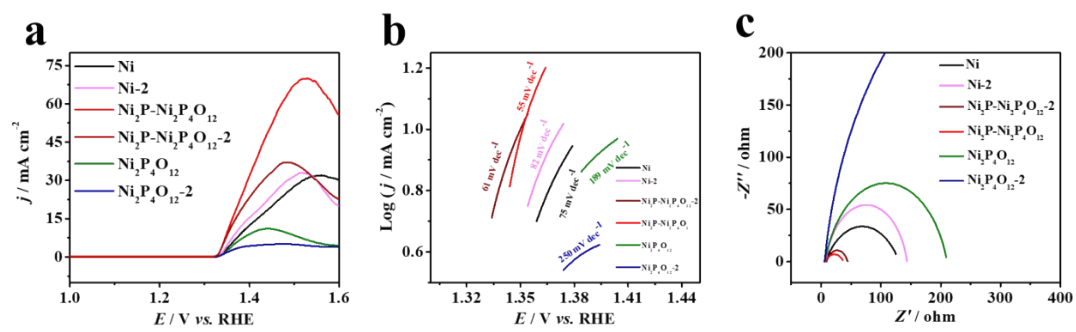

**Fig. S6** The UOR performance of different catalysts. (a) Polarization curves of various catalysts at  $5 \text{ mV s}^{-1}$  in  $1 \text{ M KOH} + 0.33 \text{ M urea}$ . (b) The Tafel slopes. (c) Nyquist plots at  $1.35 \text{ V vs. RHE}$ .

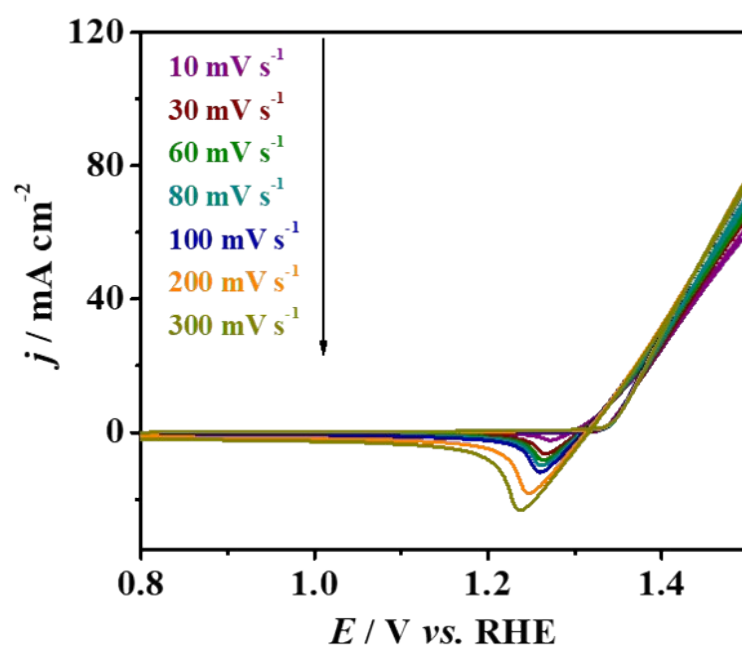

**Fig. S7** UOR polarization plots of  $\text{Ni}_2\text{P-Ni}_2\text{P}_4\text{O}_{12}$  catalyst at different scan rates.



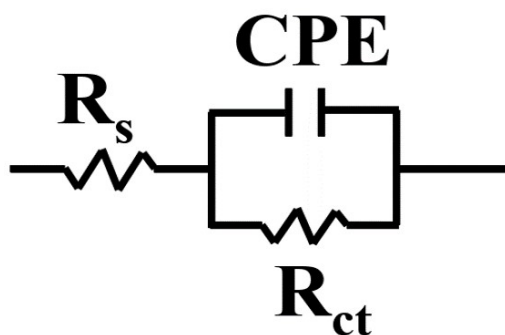

**Fig. S8** The Nyquist Plots of as prepared samples are fitted to a simplified equivalent model.

The equivalent circuit model consisting of three parts:  $R_{ct}$  is the charge transfer resistance,  $R_s$  is denoted as the bulk solution resistance and CPE corresponds the constant phase element.

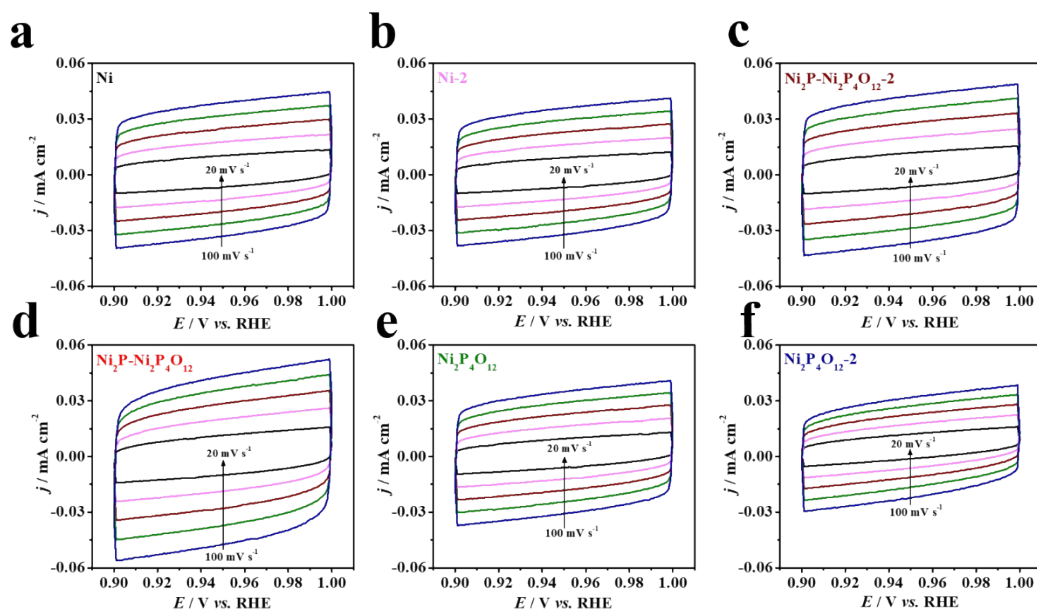

**Fig. S9** Cyclic voltammograms (CV) of (a) Ni, (b) Ni-2, (c) Ni<sub>2</sub>P-Ni<sub>2</sub>P<sub>4</sub>O<sub>12</sub>-2, (d) Ni<sub>2</sub>P-Ni<sub>2</sub>P<sub>4</sub>O<sub>12</sub>, (e) Ni<sub>2</sub>P<sub>4</sub>O<sub>12</sub> and (f) Ni<sub>2</sub>P<sub>4</sub>O<sub>12</sub>-2 at different scan rates of 20, 40, 60, 80, and 100 mV s<sup>-1</sup> in 1 M KOH solution for  $C_{dl}$  testing at non-faradic reaction potential region for UOR.

The electrochemical active surface area (ECSA) was estimated in 1.0 M KOH in terms of the double-layer capacitances ( $C_{dl}$ ) from cyclic voltammetry (CV) at the scan rates of 20-100 mV s<sup>-1</sup> (20, 40, 60, 80, 100 mV s<sup>-1</sup>). The potential range of the measurements is from 0.9 to 1 V vs. RHE in a non-Faradaic region. The current density differences ( $\Delta j = j_a - j_c$ ) at 0.95 V vs. RHE were plotted against scan rates, and the linear slope is the  $C_{dl}$ .

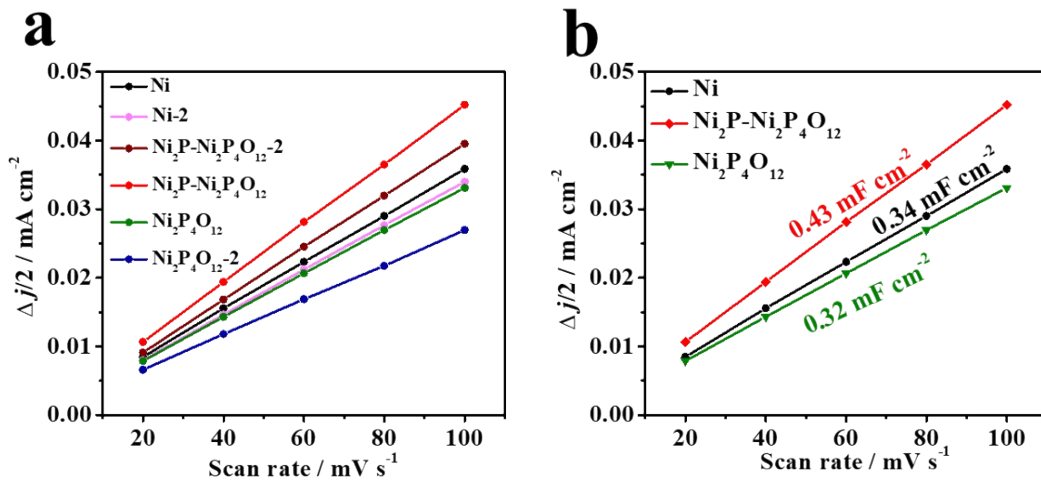

**Fig. S10** The charging current density differences plotted against scan rates of the as-prepared catalysts. The linear slope is equivalent to electrochemical double-layer capacitance ( $C_{dl}$ ).

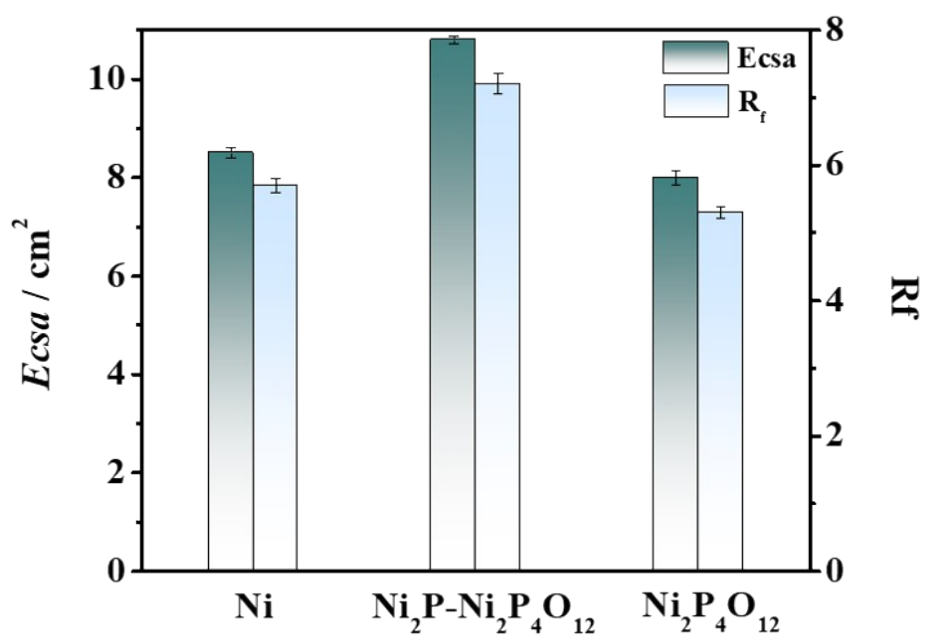

**Fig. S11** Electrochemical active surface area (ECSA) and roughness factors ( $R_f$ ) of different samples.

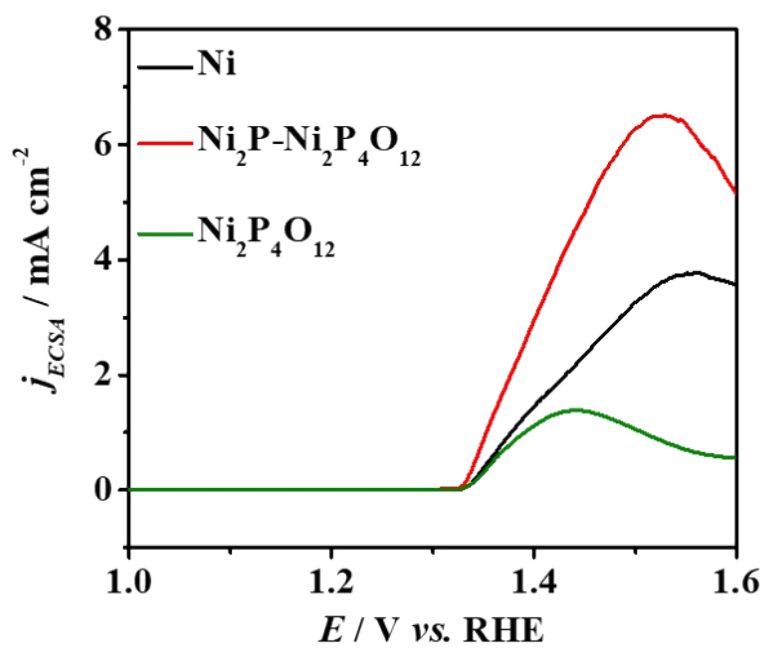

**Fig. S12** ESCA-normalized LSV curves of Ni,  $\text{Ni}_2\text{P-Ni}_2\text{P}_4\text{O}_{12}$  and  $\text{Ni}_2\text{P}_4\text{O}_{12}$ .

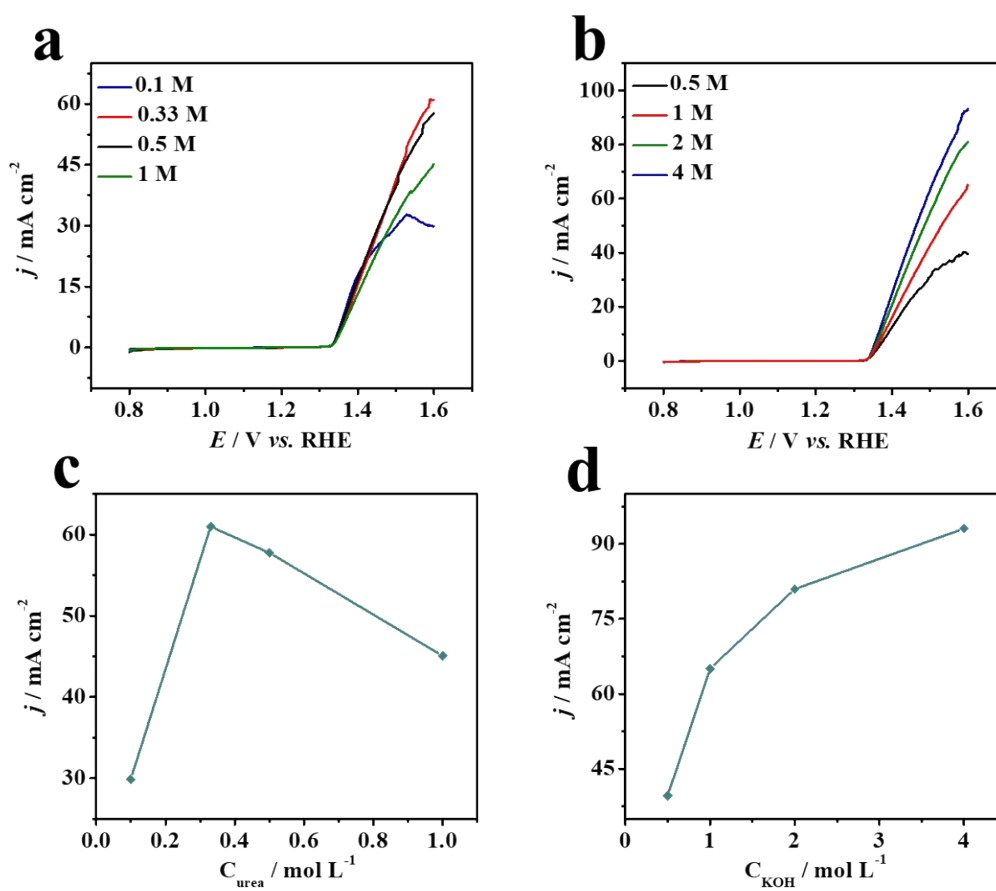

**Fig. S13** The UOR performance of Ni<sub>2</sub>P-Ni<sub>2</sub>P<sub>4</sub>O<sub>12</sub> catalyst (a), (c) in 1.0 M KOH with various urea concentrations, (b), (d) in 0.33 M urea with various KOH concentrations.

The influence of urea concentrations was tested in 1 M KOH solution on Ni<sub>2</sub>P-Ni<sub>2</sub>P<sub>4</sub>O<sub>12</sub> electrode at a scan rate of 5 mV s<sup>-1</sup> and shown in Fig. S13a, c. The oxidation current density  $j$  increases linearly from 0.1 M to 0.33 M urea, subsequently decreases at concentrations of urea higher than 0.33 M, which can be attributed to the fact that the NiOOH active sites are occupied by excessive urea molecules, resulting in local OH<sup>-</sup> species deprivation and thus reduced UOR performance. Also, the effect of KOH concentration in 0.33 M urea is shown in Fig. S13b, d. It can clearly see that the current density with increasing OH<sup>-</sup> concentration, while the onset potential decreases with the raise of KOH concentration. This can be interpreted as a higher OH<sup>-</sup> concentration favoring the generation of NiOOH active sites.

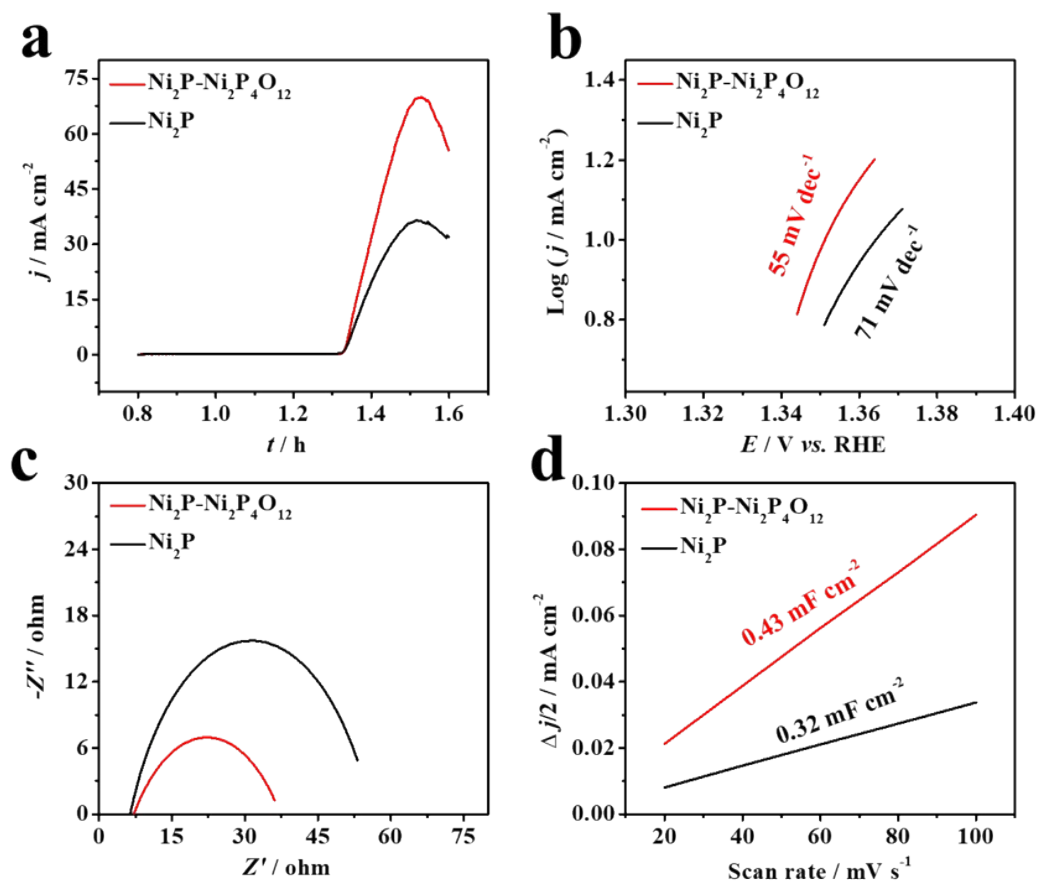

Fig. S14. The electrochemical properties of  $\text{Ni}_2\text{P-Ni}_2\text{P}_4\text{O}_{12}$  and  $\text{Ni}_2\text{P}$ , respectively.

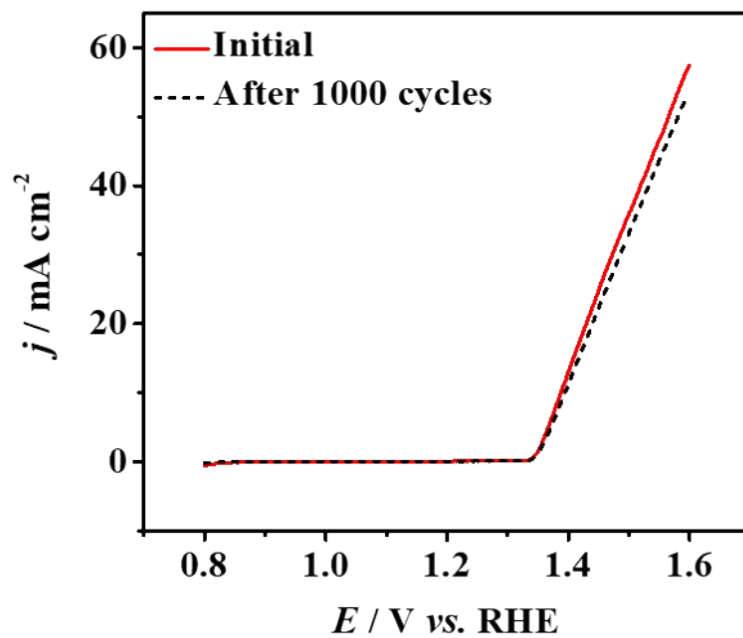

**Fig. S15** The polarization curve before and after 1000 CV cycles of Ni<sub>2</sub>P-Ni<sub>2</sub>P<sub>4</sub>O<sub>12</sub> (The catalyst was loaded on the carbon cloth).



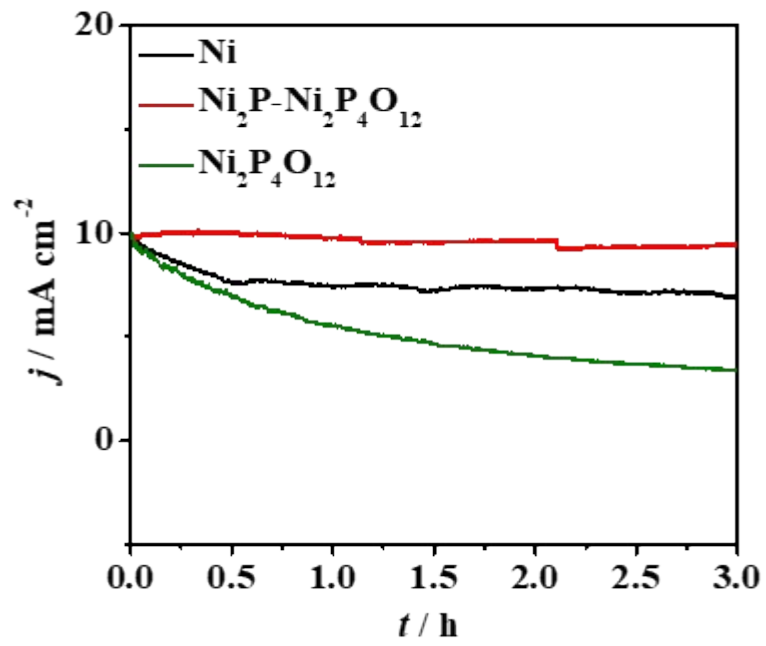

**Fig. S16** The chronoamperometric stability for 3 h for Ni,  $\text{Ni}_2\text{P-Ni}_2\text{P}_4\text{O}_{12}$  and  $\text{Ni}_2\text{P}_4\text{O}_{12}$ .

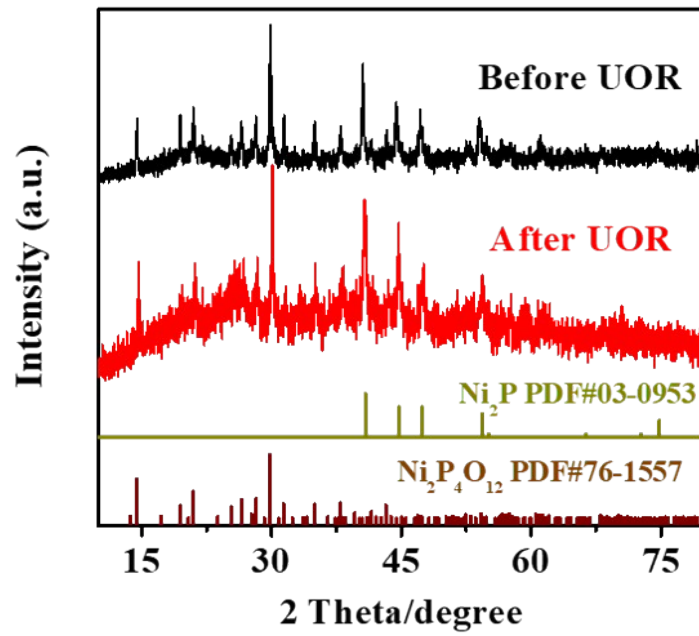

**Fig. S17** The XRD patterns of  $\text{Ni}_2\text{P}-\text{Ni}_2\text{P}_4\text{O}_{12}$  before and after stability test.

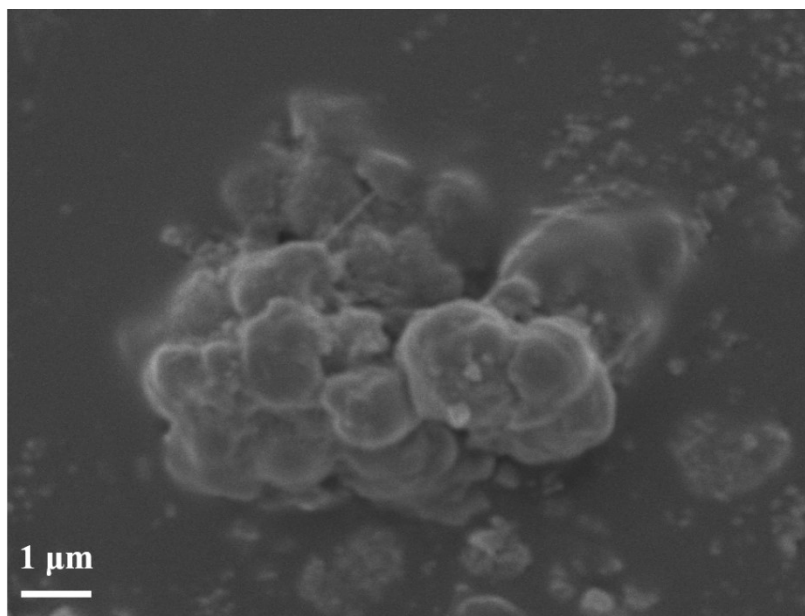

**Fig. S18** The SEM image of Ni<sub>2</sub>P-Ni<sub>2</sub>P<sub>4</sub>O<sub>12</sub> after stability test.

**Table S1.** The formation mechanism of the three catalysts can be understood by following reaction processes

|     | <b>Reaction mechanism</b>                                                                                                                                |
|-----|----------------------------------------------------------------------------------------------------------------------------------------------------------|
| (1) | $2\text{H}_2\text{PO}_2^- \rightarrow \text{PH}_3\uparrow + \text{HPO}_4^{2-}$                                                                           |
| (2) | $16\text{Ni}^{2+} + 9\text{PH}_3 + 4\text{H}_2\text{O} \rightarrow 8\text{Ni}_2\text{P} + \text{HPO}_4^{2-} + 34\text{H}^+$                              |
| (3) | $\text{HPO}_4^{2-} \rightarrow \text{PO}_3^- + \text{OH}^-$                                                                                              |
| (4) | $4\text{Ni}^{2+} + \text{PH}_3 + 4\text{H}_2\text{O} \rightarrow 4\text{Ni} + \text{HPO}_4^{2-} + 10\text{H}^+$                                          |
| (5) | $\text{Ni}^{2+} + 2\text{PO}_3^- \rightarrow \text{Ni}_2\text{P}_4\text{O}_{12}$ $\searrow \quad \uparrow \text{aggregation}$ $\text{Ni}(\text{PO}_3)_2$ |

**Table S2.** Ni and P content determined by ICP results of Ni<sub>2</sub>P-Ni<sub>2</sub>P<sub>4</sub>O<sub>12</sub> (The sample was averaged over three tests).

| Sample                                                           | Ni (mg/mL)   | P (mg/mL)    |
|------------------------------------------------------------------|--------------|--------------|
| Ni <sub>2</sub> P-Ni <sub>2</sub> P <sub>4</sub> O <sub>12</sub> | 337.8 ± 0.85 | 214.9 ± 0.73 |

**Table S3.** The XPS binding energies of Ni 2p, P 2p, and O 1s for Ni, Ni<sub>2</sub>P-Ni<sub>2</sub>P<sub>4</sub>O<sub>12</sub>, Ni<sub>2</sub>P<sub>4</sub>O<sub>12</sub>, respectively.

| Sample                                                           | Ni 2p                                                                                                                                                                     | P 2p                                                                               | O 1s                                                                               |
|------------------------------------------------------------------|---------------------------------------------------------------------------------------------------------------------------------------------------------------------------|------------------------------------------------------------------------------------|------------------------------------------------------------------------------------|
| Ni                                                               | 852.73 eV, 869.07 eV (Ni <sup>0</sup> )<br>856.22 eV, 873.99 eV (Ni <sup>2+</sup> )<br>861.29 eV, 879.75 eV (Sat.)                                                        | /                                                                                  | /                                                                                  |
| Ni <sub>2</sub> P-Ni <sub>2</sub> P <sub>4</sub> O <sub>12</sub> | <b>852.97 eV (Ni<sup>0</sup>)</b><br><b>856.69 eV, 874.52 eV (Ni<sup>2+</sup>)</b><br><b>861.77 eV, 880.42 eV (Sat.)</b><br><b>858.32 eV, 876.67 eV (Ni<sup>3+</sup>)</b> | <b>133.66 eV (P-O-Ni species)</b><br><b>134.44 eV (PO<sub>3</sub><sup>-</sup>)</b> | <b>531.44 eV (P-O-Ni species)</b><br><b>533.11 eV (PO<sub>3</sub><sup>-</sup>)</b> |
| Ni <sub>2</sub> P <sub>4</sub> O <sub>12</sub>                   | 856.14 eV, 873.46 eV (Ni <sup>2+</sup> )<br>861.72 eV, 879.78 eV (Sat.)<br>858.3 eV, 874.96 eV (Ni <sup>3+</sup> )                                                        | 133.79 eV (P-O-Ni species)<br>134.39 (PO <sub>3</sub> <sup>-</sup> )               | 531.83 eV (P-O-Ni species)<br>533.28 eV (PO <sub>3</sub> <sup>-</sup> )            |

**Table S4.** Comparison of UOR performance for Ni<sub>2</sub>P-Ni<sub>2</sub>P<sub>4</sub>O<sub>12</sub> and recent reported electrocatalyst tested on glass carbon electrode (GCE).

| Catalysts                                                        | Electrolyte                   | Potential at 10 mA cm <sup>-2</sup> (V) | Tafel Slope (mV dec <sup>-1</sup> ) | Ref.             |
|------------------------------------------------------------------|-------------------------------|-----------------------------------------|-------------------------------------|------------------|
| <b>Ni<sub>2</sub>P-Ni<sub>2</sub>P<sub>4</sub>O<sub>12</sub></b> | <b>1.0 M KOH+ 0.33 M urea</b> | <b>1.35</b>                             | <b>55</b>                           | <b>This work</b> |
| NiOH-D                                                           | 1.0 M KOH+ 0.33 M urea        | 1.38                                    | 74                                  | [1]              |
| Metallic Ni(OH) <sub>2</sub>                                     | 1.0 M KOH+ 0.33 M urea        | 1.38                                    | /                                   | [2]              |
| NiS <sub>2</sub> -MoS <sub>2</sub>                               | 1.0 M KOH+ 0.33 M urea        | 1.52                                    | 62.3                                | [3]              |
| NiCr/C                                                           | 1.0 M KOH+ 0.33 M urea        | 1.38                                    | /                                   | [4]              |
| Ni/Sn dendrites                                                  | 1.0 M KOH+ 0.33 M urea        | 1.41                                    | 35                                  | [5]              |
| Pristine Ni MOF                                                  | 1.0 M KOH+ 1 M urea           | 1.36                                    | 64                                  | [6]              |
| Ni <sub>2</sub> P                                                | 1.0 M KOH+ 0.5 M urea         | 1.35                                    | 100                                 | [7]              |
| NiMn/C                                                           | 1.0 M KOH+ 0.33 M urea        | 1.40                                    | /                                   | [8]              |
| Ni/C-1                                                           | 1.0 M KOH+ 0.33 M urea        | 1.39                                    | 62                                  | [9]              |

- [1] L.S. Zhang, L.P. Wang, H.P. Lin, Y.X. Liu, J.Y. Ye, Y.Z. Wen, A. Chen, L. Wang, F.L. Ni, Z.Y. Zhou, S.G. Sun, Y.Y. Li, B. Zhang, H.S. Peng, A Lattice-Oxygen-Involved Reaction Pathway to Boost Urea Oxidation, *Angew. Chem., Int. Ed.*, 58 (2019) 16820-16825.
- [2] X.J. Zhu, X.Y. Dou, J. Dai, X.D. An, Y.Q. Guo, L.D. Zhang, S. Tao, J.Y. Zhao, W.S. Chu, X.C. Zeng, C.Z. Wu, Y. Xie, Metallic Nickel Hydroxide Nanosheets Give Superior Electrocatalytic Oxidation of Urea for Fuel Cells, *Angew. Chem., Int. Ed.*, 55 (2016) 12465-12469.
- [3] S.L. Wang, L.Y. Zhao, J.X. Li, X.L. Tian, X. Wu, L.G. Feng, High valence state of Ni and Mo synergism in NiS<sub>2</sub>-MoS<sub>2</sub> hetero-nanorods catalyst with layered surface structure for urea electrocatalysis, *J. Energy Chem.*, 66 (2022) 483-492.
- [4] R.K. Singh, A. Schechter, Electroactivity of NiCr Catalysts for Urea Oxidation in Alkaline Electrolyte, *Chemcatchem*, 9 (2017) 3374-3379.
- [5] R.K. Singh, P. Subramanian, A. Schechter, Enhanced Urea Activity of Oxidation on Nickel-Deposited Tin Dendrites, *Chemelectrochem*, 4 (2017) 1037-1043.
- [6] V. Maruthapandian, S. Kumaraguru, S. Mohan, V. Saraswathy, S. Muralidharan, An Insight on the Electrocatalytic Mechanistic Study of Pristine Ni MOF (BTC) in Alkaline Medium for Enhanced OER and UOR, *Chemelectrochem*, 5 (2018) 2795-2807.
- [7] H.P. Liu, S.L. Zhu, Z.D. Cui, Z.Y. Li, S.L. Wu, Y.Q. Liang, Ni<sub>2</sub>P nanoflakes for the high-performing urea oxidation reaction: linking active sites to a UOR mechanism, *Nanoscale*, 13 (2021) 1759-1769.
- [8] N.A.M. Barakat, M. Alajami, Y. Al Haj, M. Obaid, S. Al-Meer, Enhanced onset potential NiMn-decorated activated carbon as effective and applicable anode in urea fuel cells, *Catal. Commun.*, 97 (2017) 32-36.

- [9] L. Wang, L.T. Ren, X.R. Wang, X. Feng, J.W. Zhou, B. Wang, Multivariate MOF-Templated Pomegranate-Like Ni/C as Efficient Bifunctional Electrocatalyst for Hydrogen Evolution and Urea Oxidation, *ACS Appl. Mater. Interfaces*, 10 (2018) 4750-4756.



**Table S5** EIS fitting parameters from equivalent circuits for all samples.

| Samples                                                             | $R_s$       | $R_{ct}$     | CPE                                     |
|---------------------------------------------------------------------|-------------|--------------|-----------------------------------------|
| Ni                                                                  | 7.20        | 117.90       | $3.15 \times 10^{-3}$                   |
| Ni-2                                                                | 7.86        | 127.74       | $2.12 \times 10^{-3}$                   |
| <b>Ni<sub>2</sub>P-Ni<sub>2</sub>P<sub>4</sub>O<sub>12</sub></b>    | <b>7.14</b> | <b>23.03</b> | <b><math>8.25 \times 10^{-3}</math></b> |
| Ni <sub>2</sub> P-Ni <sub>2</sub> P <sub>4</sub> O <sub>12</sub> -2 | 9.18        | 26.03        | $1.83 \times 10^{-3}$                   |
| Ni <sub>2</sub> P <sub>4</sub> O <sub>12</sub>                      | 6.32        | 197.88       | $8.17 \times 10^{-4}$                   |
| Ni <sub>2</sub> P <sub>4</sub> O <sub>12</sub> -2                   | 5.98        | 732.02       | $2.25 \times 10^{-8}$                   |
